# Supplementary material for: Highly efficient mica-incorporated graphene oxide-based membranes for water purification and desalination
Source: Royal Society of Chemistry journal article supplement (doi:10.1039/d4cp01182a), 2024-01-01
Supplement: d4cp01182a1.pdf [file d4cp01182a1.pdf]

## Electronic Supplementary Information

### **Highly Efficient Mica-Incorporated Graphene Oxide-based Membranes for Water Purification and Desalination**

Ahmed Ali Jamali<sup>1†</sup>, Muhammad Ismail Vohra<sup>2†</sup>, Akbar Ali<sup>3</sup>, Ahmed Nadeem<sup>4</sup>, Sabry M Attia<sup>4</sup>,  
Ali Hyder<sup>5</sup>, Ayaz Ali Memon<sup>5</sup>, Faraz Khan Mahar<sup>1</sup>, Rasool Bux Mahar<sup>1</sup>, Jun Yang<sup>3\*</sup>, Khalid  
Hussain Thebo<sup>6\*</sup>

*<sup>1</sup>U.S.-Pakistan Centre for Advanced Studies in Water (USPCAS-W), Mehran University of  
Engineering and Technology (76062), Jamshoro, Pakistan*

*<sup>2</sup>One Health Laboratory, Research and Development Karachi, Pakistan*

*<sup>3</sup>State Key Laboratory of Multiphase Complex Systems, Institute of Process Engineering (IPE),  
Chinese Academy of Sciences, Beijing 100F190, China*

*<sup>4</sup>Department of Pharmacology and Toxicology, College of Pharmacy, King Saud University,  
Riyadh 11451, Saudi Arabia*

*<sup>5</sup>National Center of Excellence in Analytical Chemistry, University of Sindh (76080), Jamshoro  
Pakistan*

*<sup>6</sup>Institute of Metal Research (IMR), Chinese Academy of Sciences, Shenyang, China*

Corresponding Email: [jyang@ipe.ac.cn](mailto:jyang@ipe.ac.cn) (J. Y.)\*

[Khalidthebo@yahoo.com](mailto:Khalidthebo@yahoo.com) (K.H.T.)\*

*† Contributed Equally*

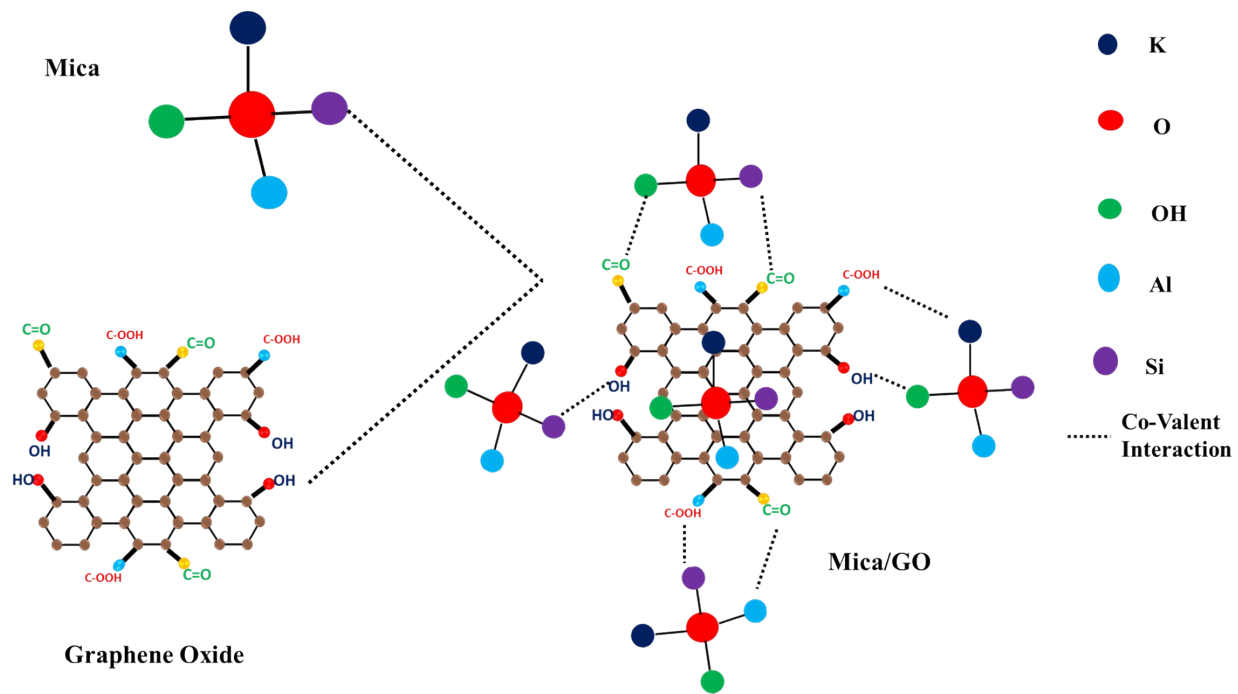

**Fig S1.** Proposed mechanism of mica with graphene oxide nanosheets.

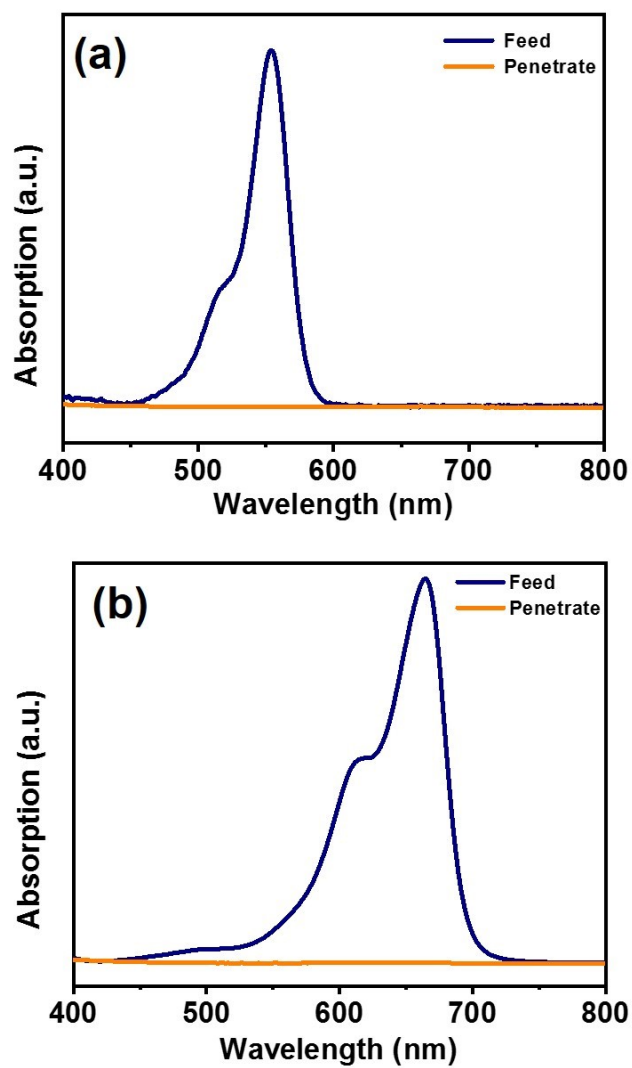

**Fig. S2. (a,b)** Ultraviolet-visible absorption spectra of the feed, and permeate of (a) RB, and (b) MLB solution after filtration by MGO composite membrane.

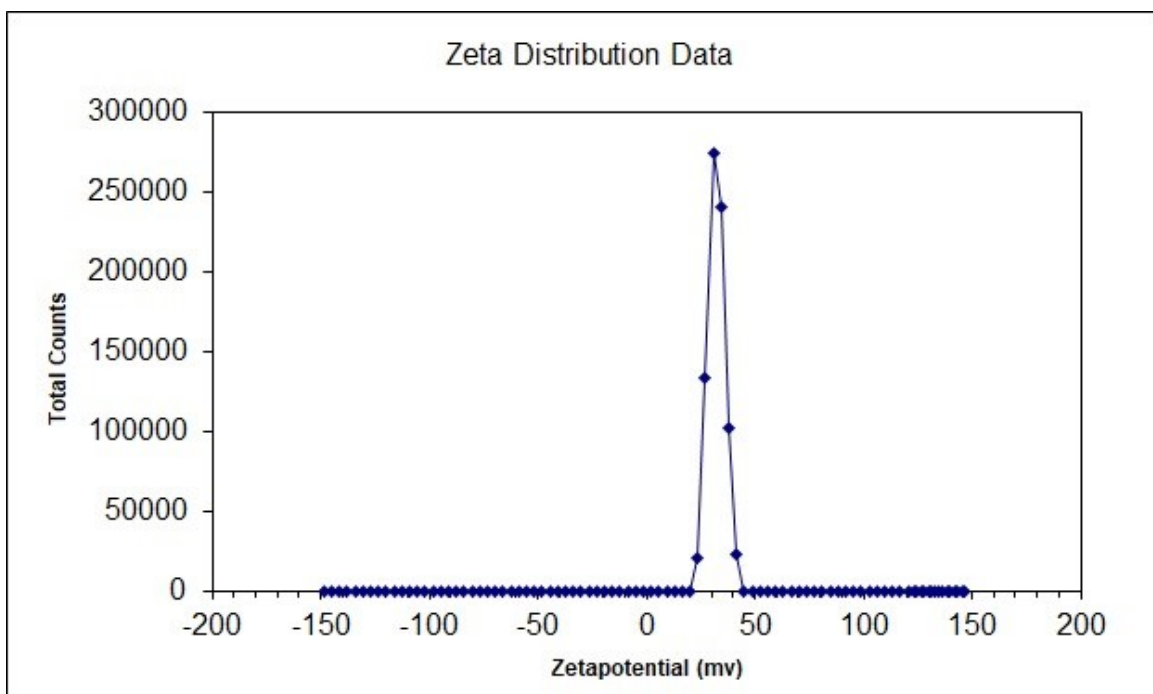

**Fig. S3** Zeta potential graph of MGO membranes

**Table S1.** The equilibrium weight swelling ratio (ESR) of GO, MGO (50 wt.%) membranes in water.

| Type of membrane | ESR           |
|------------------|---------------|
| GO               | $2.5 \pm 0.1$ |
| MGO              | $1.2 \pm 0.1$ |

---

**Table S2. Permeance of GO and MGO Membranes by Varying Different Thicknesses in DI Water at Room Temperature**

| Thickness (nm) | Pristine GO membrane Permeance (L m <sup>-2</sup> h <sup>-1</sup> bar <sup>-1</sup> ) | Thickness (nm) | MGO membrane Permeance (L m <sup>-2</sup> h <sup>-1</sup> bar <sup>-1</sup> ) |
|----------------|---------------------------------------------------------------------------------------|----------------|-------------------------------------------------------------------------------|
| 290 ± 10       | 85 ± 5                                                                                | 260 ± 10       | 870 ± 5                                                                       |
| 620 ± 10       | 46 ± 4                                                                                | 530 ± 10       | 665 ± 5                                                                       |
| 940 ± 10       | 30 ± 2                                                                                | 790 ± 10       | 540 ± 5                                                                       |
| 1460 ± 10      | 10 ± 2                                                                                | 1350 ± 10      | 355 ± 5                                                                       |

---
